# Supplementary material for: First generation of pentazole (HN5, pentazolic acid), the final azole, and a zinc pentazolate salt in solution: A new N-dearylation of 1-(p-methoxyphenyl) pyrazoles, a 2-(p-methoxyphenyl) tetrazole and application of the methodology to 1-(p-methoxyphenyl) pentazoleElectronic supplementary information (ESI) available: experimental details. See http://www.rsc.org/suppdata/cc/b3/b301491f/
Source: Royal Society of Chemistry journal article supplement (doi:10.1039/b301491f), 2003-03-18

# Supplementary Material

§ Solutions of the 1-(*p*-methoxyphenyl)-3,5-disubstituted-1H-pyrazoles **1a**, **1b** and **1c** (1.9mmol) in MeCN (19cm3) were treated dropwise with aqueous solutions (4cm3) of ceric ammonium nitrate (CAN) (5.7mmol) and stirred for 1h at ambient temperature or 24 h to72 h at -10oC. The solutions were diluted with water (30cm3) and the MeCN was removed under reduced pressure. The aqueous solutions remaining were extracted with CH2Cl2 (4 x 20cm3). The combined organic extracts were washed with saturated NaHCO3 solution (4 x 20cm3), dried (anhydrous MgSO4) and the solvent removed under reduced pressure. The residue in CH2Cl2 (3cm3) was placed on a flash column of silica-gel (230-400 mesh ASTM) and eluted with petroleum spirit (bp 40-60oC)-CH2Cl2 from 1:0 to 0:1 with a gradient change of 5% v/v between each elution to give p-benzoquinone, CH2Cl2-Et2O from 1:0 to 0:1 with a gradient change of 5% v/v to give **3a** and **3b** and Et2O-MeOH from 1:0 to 95:5 with a gradient change of 1% v/v to give **3c** (Figure 1).

 *p*-Anisidine (0.28g, 2.3mmol) in MeOH (1.44cm3) was treated dropwise with conc. HCl (0.36cm3) at 0-2oC. Slowly and with stirring isoamyl nitrite (0.34cm3, 2.5mmol) was added. The solution was allowed to stand for 20 mins at 0-2oC and then diluted with a MeOH/H2O (1:1 v/v) mixture (4.0cm3). A layer of petroleum spirit (bp 40-60oC)( 22cm3) was placed over the solution and the mixture cooled to -35oC. A precooled solution of 15N labeled sodium azide (0.15g, 2.3mmol) in a MeOH/H2O (60:40 v/v) mixture (1.22cm3) was injected into the lower aqueous layer. A solid mixture of 1-(*p*-methoxyphenyl)pentazole and *p*-methoxyphenylazide separated and was filtered using a sintered glass funnel with a cooling jacket at -40oC. The solid was carefully washed with a MeOH/H2O (60:40v/v) mixture (1.5cm3), precooled to -55C, to give 1-(p-methoxyphenyl)pentazole containing less than 10% p-methoxyphenyl azide, by 1H NMR analysis. (Samples of 1-(*p*-methoxyphenyl)pentazole with no *p*-methoxyphenylazide could not be achieved).

A solution of 1-(*p*-methoxyphenyl)pentazole (ca. 0.5mmol), containing some *p*-methoxyphenylazide <10%), and Zn(NO3)2.6H20 (0.89g, 3.0mmol) in CD3OD/D2O (2.65cm3, 94:6 v/v) was treated dropwise with a solution of CAN (0.77g, 1.4mmol) in D2O (0.6cm3) at -40oC. The mixture was allowed to stir for 30 mins at this temperature (stock soln.). A sample was then removed to a NMR tube at -40oC, without allowing the temperature to rise, and the reaction allowed to continue for 8 hrs at -40oC while 15N NMR spectra were measured. Further samples were taken from the stock solution over a period of 14 days. When samples whose 15N NMR spectra had been measured at -40oC were equilibrated at -20oC for periods of ca. 24 hrs signals for 15N2 (-72 ppm) and 15N3– -283 ppm and -147 ppm were observed.


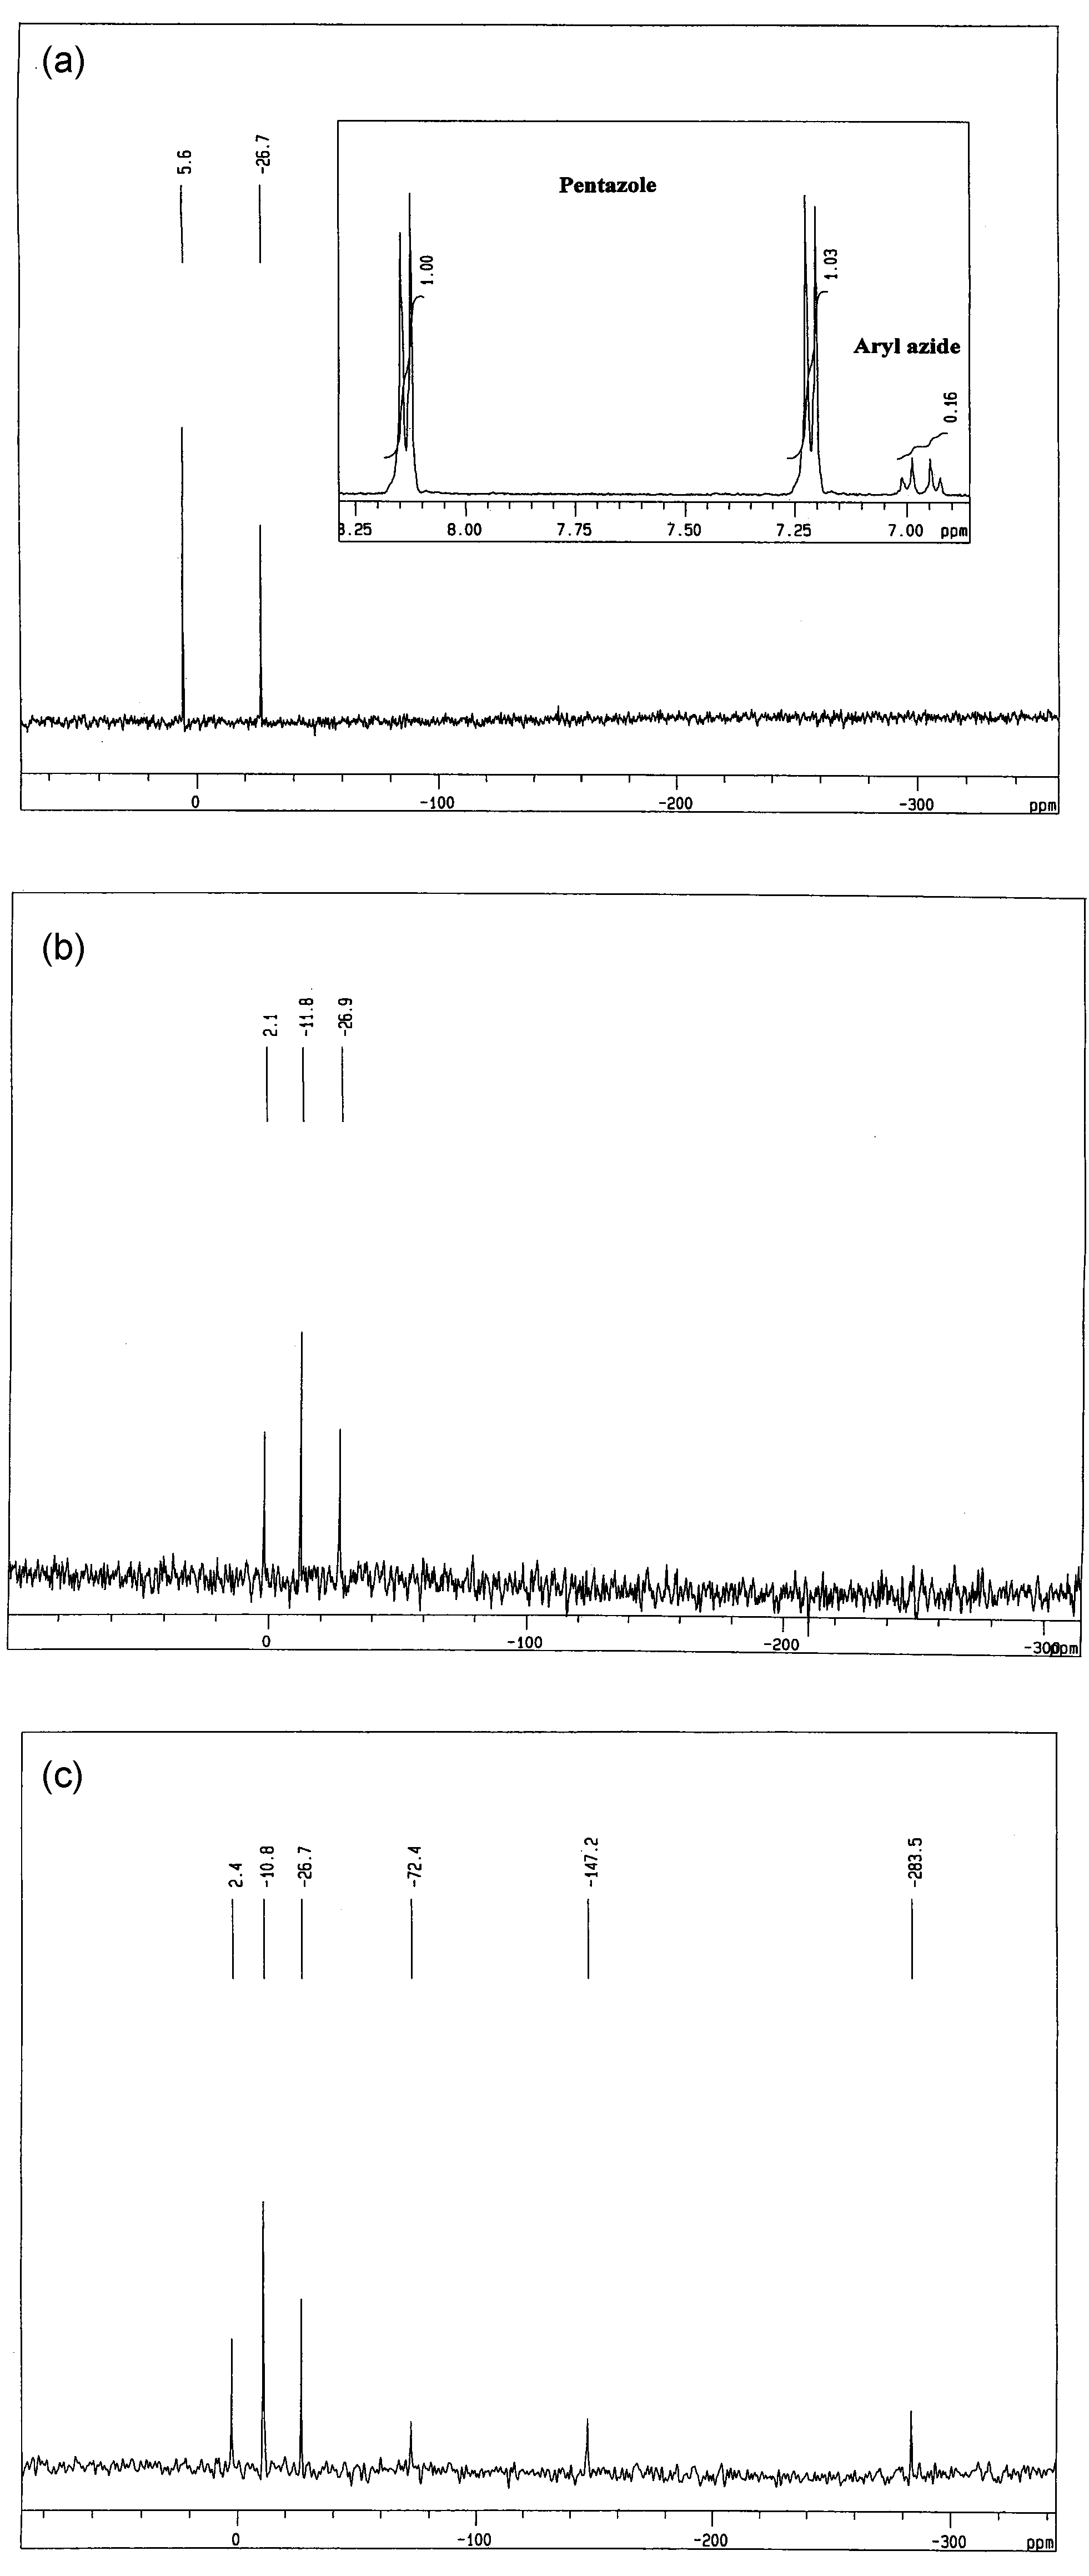

Supplement: b301491f.doc [file b301491f.doc]
